# Supplementary material for: Comparison of Models for Tumor Recurrence after Liver Transplantation for the Patients with Hepatocellular Carcinoma: A Multicenter Long-Term Follow-Up Study
Source: MDPI journal article supplement (doi:10.3390/cancers11091295), 2019-09-03
Supplement: s1 [file s1]

# Supplementary Materials: Comparison of Models for Tumor Recurrence after Liver Transplantation for the Patients with Hepatocellular Carcinoma: A Multicenter Long-Term Follow-Up Study

Young Chang, Yuri Cho, Jeong-Hoon Lee, Yun Bin Lee, Eun Ju Cho, Su Jong Yu, Dong Hyun Sinn, Bo Hyun Kim, Seoung Hoon Kim, Nam-Joon Yi, Kwang-Woong Lee, Jong Man Kim, Joong-Won Park, Yoon Jun Kim, Jung-Hwan Yoon, Jae-Won Joh and Kyung-Suk Suh

**Table S1.** C-indices for predicting HCC recurrence by various models in the beyond-MC and within-MC subcohorts.

|                     |                                 | C-Index | 95% CI |       | <i>p</i> Value * |
|---------------------|---------------------------------|---------|--------|-------|------------------|
|                     |                                 |         | Lower  | Upper |                  |
| Beyond-MC subcohort | MoRAL score                     | 0.80    | 0.73   | 0.86  |                  |
|                     | WCM model                       | 0.70    | 0.64   | 0.75  | <0.001           |
|                     | AFP model                       | 0.65    | 0.60   | 0.70  | <0.001           |
|                     | UCSF or Up-to-seven and AFP     | 0.67    | 0.61   | 0.72  | <0.001           |
|                     | Metroticket 2.0 Model           | 0.61    | 0.56   | 0.66  | <0.001           |
|                     | UCSF criteria                   | 0.53    | 0.48   | 0.59  | <0.001           |
|                     | Up-to-seven criteria            | 0.55    | 0.51   | 0.60  | <0.001           |
|                     | Total tumor volume/AFP criteria | 0.61    | 0.55   | 0.66  | <0.001           |
|                     | Kyoto criteria                  | 0.61    | 0.56   | 0.66  | <0.001           |
| Within-MC subcohort | MoRAL score                     | 0.69    | 0.62   | 0.76  |                  |
|                     | WCM model                       | 0.61    | 0.55   | 0.67  | 0.03             |
|                     | AFP model                       | 0.59    | 0.56   | 0.62  | 0.002            |
|                     | UCSF or Up-to-seven and AFP     | 0.62    | 0.57   | 0.66  | 0.02             |
|                     | Metroticket 2.0 Model           | 0.58    | 0.55   | 0.61  | <0.001           |
|                     | UCSF criteria                   | 0.52    | 0.51   | 0.53  | <0.001           |
|                     | Up-to-seven criteria            | 0.50    | 0.50   | 0.50  | <0.001           |
|                     | Total tumor volume/AFP criteria | 0.57    | 0.54   | 0.61  | <0.001           |
|                     | Kyoto criteria                  | 0.50    | 0.50   | 0.50  | <0.001           |

\* Compare to the *c*-index of the MoRAL score. HCC, hepatocellular carcinoma; MC, Milan criteria; CI, confidence interval; WCM, Weill Cornell Medical College; AFP, alpha-fetoprotein, UCSF, University of California San Francisco.

**Table S2.** Comparison of the area under the ROC curve for predicting 1-year, 3-year, and 5-year HCC recurrence by various predicting models in the beyond-MC subcohort.

|        |                             | AUROC | 95% CI |       | <i>p</i> Value * | <i>p</i> Value † |
|--------|-----------------------------|-------|--------|-------|------------------|------------------|
|        |                             |       | Lower  | Upper |                  |                  |
| 1 year | MoRAL score                 | 0.85  | 0.80   | 0.90  | <0.001           |                  |
|        | WCM model                   | 0.74  | 0.66   | 0.82  | <0.001           | < 0.001          |
|        | AFP model                   | 0.71  | 0.63   | 0.78  | <0.001           | < 0.001          |
|        | UCSF or Up-to-seven and AFP | 0.71  | 0.64   | 0.79  | <0.001           | < 0.001          |
|        | Metroticket 2.0 Model       | 0.65  | 0.57   | 0.72  | 0.001            | < 0.001          |
| 3 year | MoRAL score                 | 0.88  | 0.84   | 0.93  | <0.001           |                  |
|        | WCM model                   | 0.74  | 0.67   | 0.81  | <0.001           | < 0.001          |
|        | AFP model                   | 0.71  | 0.64   | 0.78  | <0.001           | < 0.001          |
|        | UCSF or Up-to-seven and AFP | 0.73  | 0.66   | 0.80  | <0.001           | < 0.001          |
|        | Metroticket 2.0 Model       | 0.65  | 0.57   | 0.72  | <0.001           | < 0.001          |
| 5 year | MoRAL score                 | 0.85  | 0.80   | 0.91  | <0.001           |                  |
|        | WCM model                   | 0.74  | 0.67   | 0.81  | <0.001           | < 0.001          |
|        | AFP model                   | 0.69  | 0.61   | 0.76  | <0.001           | < 0.001          |
|        | UCSF or Up-to-seven and AFP | 0.71  | 0.63   | 0.78  | <0.001           | < 0.001          |
|        | Metroticket 2.0 Model       | 0.63  | 0.55   | 0.71  | 0.001            | < 0.001          |

\* Null hypothesis: Actual area = 0.5. † Compare to the AUROC of the MoRAL score. AUROC, area under the receiver operating characteristics curve; HCC, hepatocellular carcinoma; MC, Milan criteria; CI, confidence interval; WCM, Weill Cornell Medical College; AFP, alpha-fetoprotein, UCSF, University of California San Francisco

**Table S3.** Comparison of the area under the ROC curve for predicting 1-year, 3-year, and 5-year HCC recurrence various predicting models in the within-MC subcohort.

|        |                             | AUROC | 95% CI |       | <i>p</i> Value * | <i>p</i> Value † |
|--------|-----------------------------|-------|--------|-------|------------------|------------------|
|        |                             |       | Lower  | Upper |                  |                  |
| 1 year | MoRAL score                 | 0.76  | 0.66   | 0.87  | <0.001           |                  |
|        | WCM model                   | 0.68  | 0.57   | 0.79  | 0.002            | 0.12             |
|        | AFP model                   | 0.65  | 0.52   | 0.77  | 0.009            | 0.02             |
|        | UCSF or Up-to-seven and AFP | 0.70  | 0.59   | 0.81  | <0.001           | 0.26             |
|        | Metroticket 2.0 Model       | 0.65  | 0.53   | 0.77  | 0.009            | 0.02             |
| 3 year | MoRAL score                 | 0.71  | 0.63   | 0.79  | <0.001           |                  |
|        | WCM model                   | 0.63  | 0.54   | 0.72  | 0.003            | 0.06             |
|        | AFP model                   | 0.61  | 0.51   | 0.70  | 0.02             | 0.005            |
|        | UCSF or Up-to-seven and AFP | 0.64  | 0.55   | 0.73  | 0.002            | 0.08             |
|        | Metroticket 2.0 Model       | 0.58  | 0.49   | 0.68  | 0.06             | <0.001           |
| 5 year | MoRAL score                 | 0.69  | 0.62   | 0.76  | <0.001           |                  |
|        | WCM model                   | 0.60  | 0.52   | 0.68  | 0.01             | 0.04             |
|        | AFP model                   | 0.59  | 0.51   | 0.67  | 0.03             | 0.004            |
|        | UCSF or Up-to-seven and AFP | 0.61  | 0.53   | 0.70  | 0.005            | 0.046            |
|        | Metroticket 2.0 Model       | 0.57  | 0.49   | 0.66  | 0.08             | <0.001           |

\* Null hypothesis: Actual area = 0.5. † Compare to the AUROC of the MoRAL score. AUROC, area under the receiver operating characteristics curve; HCC, hepatocellular carcinoma; MC, Milan criteria; CI, confidence interval; WCM, Weill Cornell Medical College; AFP, alpha-fetoprotein, UCSF, University of California San Francisco.

**Table S4.** C-indices for predicting overall survival by various models in the beyond-MC and within-MC subcohort.

|                     |                                 | C-index | 95% CI |       | <i>p</i> Value * |
|---------------------|---------------------------------|---------|--------|-------|------------------|
|                     |                                 |         | Lower  | Upper |                  |
| Beyond-MC subcohort | MoRAL score                     | 0.70    | 0.63   | 0.78  |                  |
|                     | WCM model                       | 0.63    | 0.56   | 0.70  | 0.01             |
|                     | AFP model                       | 0.58    | 0.51   | 0.64  | <0.001           |
|                     | UCSF or Up-to-seven and AFP     | 0.64    | 0.58   | 0.71  | 0.07             |
|                     | Metroticket 2.0 Model           | 0.56    | 0.50   | 0.62  | <0.001           |
|                     | UCSF criteria                   | 0.55    | 0.49   | 0.62  | <0.001           |
|                     | Up-to-seven criteria            | 0.52    | 0.47   | 0.58  | <0.001           |
|                     | Total tumor volume/AFP criteria | 0.56    | 0.49   | 0.62  | <0.001           |
|                     | Kyoto criteria                  | 0.57    | 0.51   | 0.64  | <0.001           |
| Within-MC subcohort | MoRAL score                     | 0.59    | 0.53   | 0.66  |                  |
|                     | WCM model                       | 0.61    | 0.55   | 0.66  | 0.63             |
|                     | AFP model                       | 0.56    | 0.53   | 0.58  | 0.11             |
|                     | UCSF or Up-to-seven and AFP     | 0.57    | 0.53   | 0.61  | 0.19             |
|                     | Metroticket 2.0 Model           | 0.54    | 0.52   | 0.57  | 0.04             |
|                     | UCSF criteria                   | 0.51    | 0.50   | 0.51  | <0.001           |
|                     | Up-to-seven criteria            | 0.50    | 0.50   | 0.50  | <0.001           |
|                     | Total tumor volume/AFP criteria | 0.55    | 0.52   | 0.58  | 0.07             |
|                     | Kyoto criteria                  | 0.50    | 0.50   | 0.50  | <0.001           |

\* Compare to the c-index of the MoRAL score. MC, Milan criteria; CI, confidence interval; WCM, Weill Cornell Medical College; AFP, alpha-fetoprotein; UCSF, University of California San Francisco.

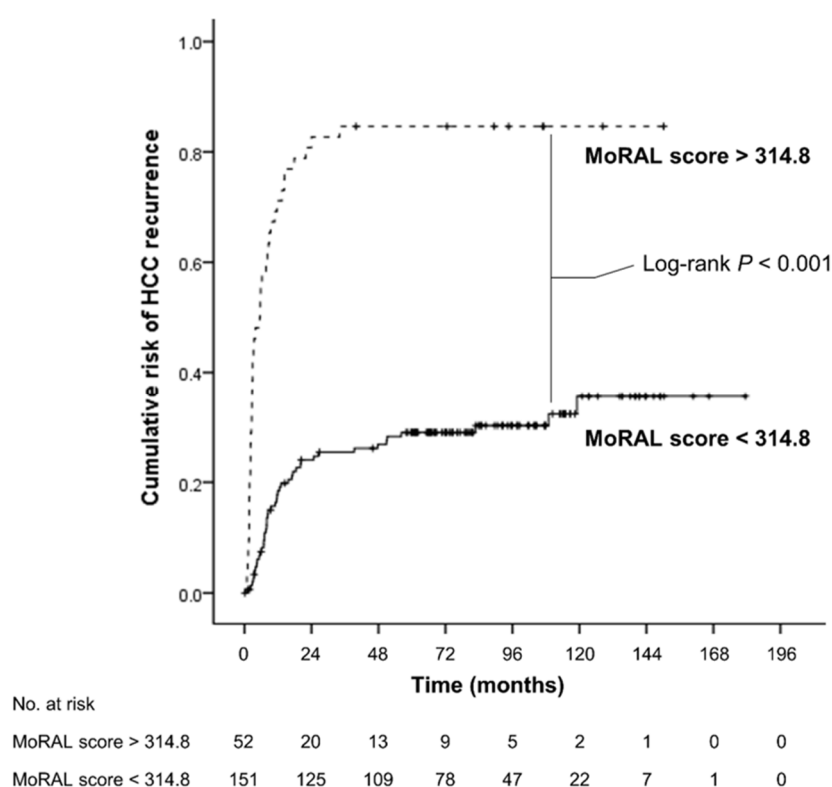

**Figure S1.** Kaplan-Meier estimates of cumulative risk of HCC recurrence according to the MoRAL score in the beyond-MC subcohort. The low-MoRAL group (shown as a continuous line) was associated with significantly lower risk of HCC recurrence than the high-MoRAL group (shown as a dashed line).

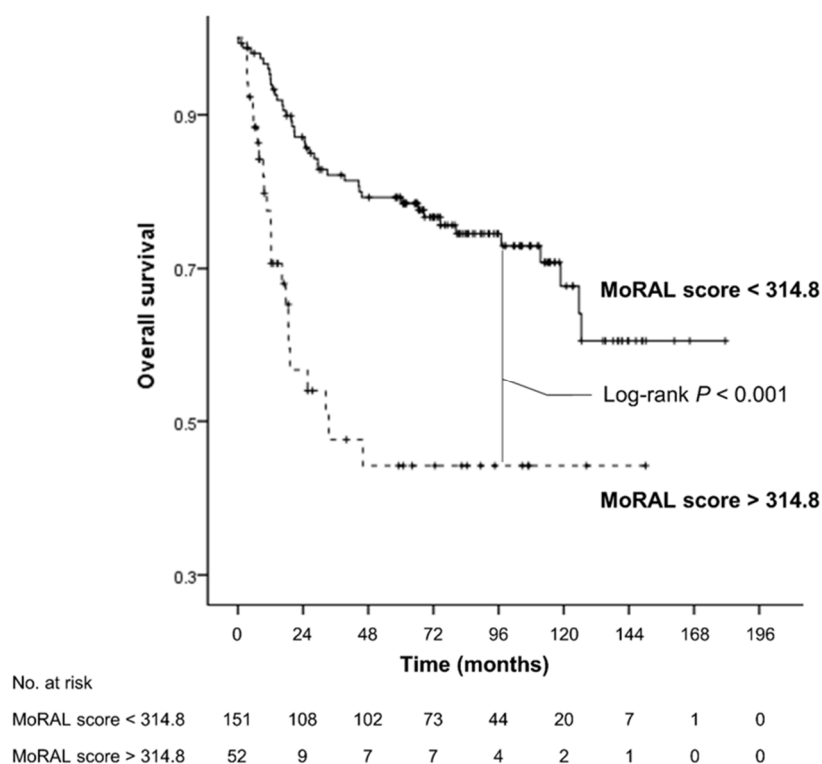

**Figure S2.** Kaplan-Meier estimates of overall survival according to the MoRAL score in the beyond-MC subcohort. The low-MoRAL group (shown as a continuous line) was associated with significantly lower risk of overall death than the high-MoRAL group (shown as a dashed line).

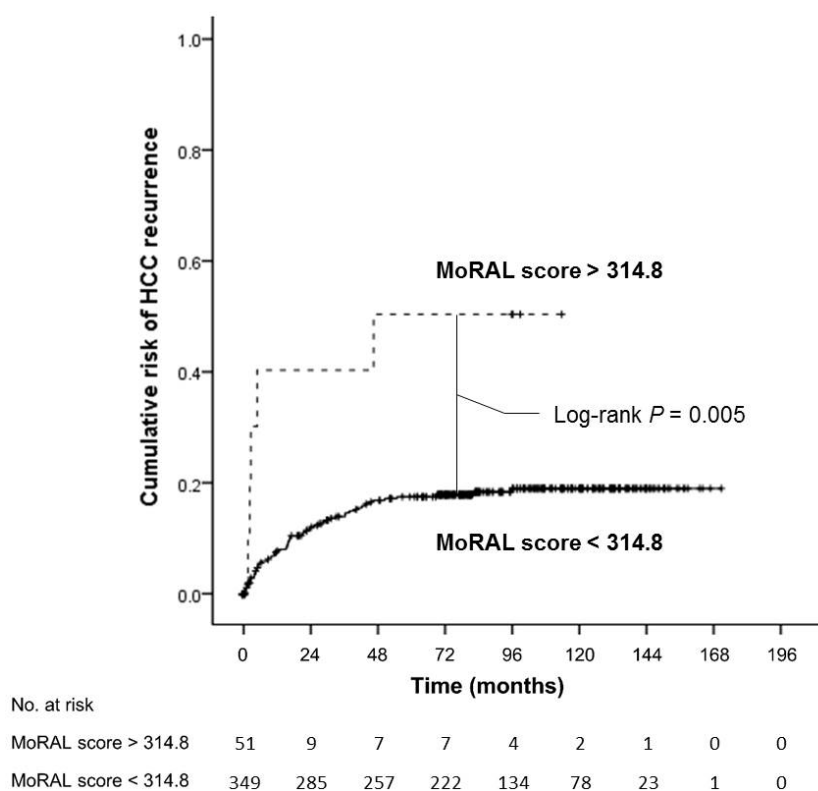

**Figure S3.** Kaplan-Meier estimates of cumulative risk of HCC recurrence according to the MoRAL score in the within-MC subcohort. The low-MoRAL group (shown as a continuous line) was associated with significantly lower risk of HCC recurrence than the high-MoRAL group (shown as a dashed line).

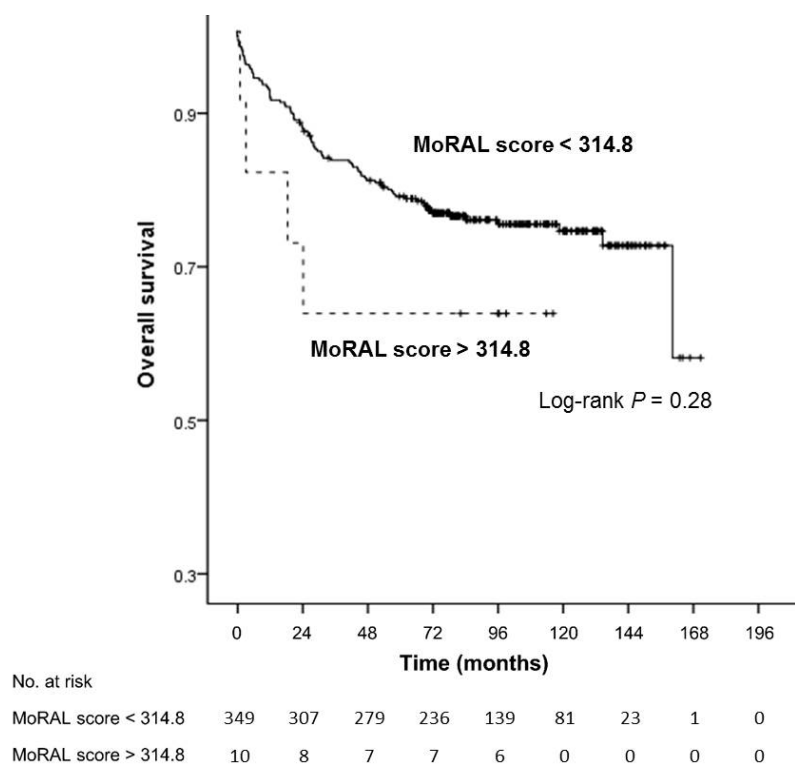

**Figure S4.** Kaplan-Meier estimates of overall survival according to the MoRAL score in the within-MC subcohort. The low-MoRAL group (shown as a continuous line) was associated with significantly lower risk of overall death than the high-MoRAL group (shown as a dashed line).

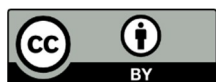

© 2019 by the authors. Licensee MDPI, Basel, Switzerland. This article is an open access article distributed under the terms and conditions of the Creative Commons Attribution (CC BY) license (<http://creativecommons.org/licenses/by/4.0/>).
